# Supplementary material for: The influence of time since introduction on the population growth of introduced species and the consequences for management
Source: Springer Nature journal article supplement (doi:10.1007/s10144-017-0581-6), 2017-04-01
Supplement: MOESM3 [file 12308520]

1    **The influence of time since introduction on the population growth of introduced**  
2    **species and the consequences for management**

3

4    Hiroyuki Yokomizo, Takenori Takada, Keiichi Fukaya, John G. Lambrinos

5

6    Center for Health and Environmental Risk Research, National Institute for Environmental  
7    Studies, Onogawa 16-2, Tsukuba 305-8506, Japan.

8

9    e-mail: [hiroyuki.yokomizo@nies.go.jp](mailto:hiroyuki.yokomizo@nies.go.jp).

10

11 Supplementary Material 1

12

13 Table S1

14 The demographic properties of introduced species included in the study.

15

16 Literature Cited

17 Bellingham PJ, Duncan RP, Lee WG, Buxton RP (2004) Seedling growth rate and survival do

18 not predict invasiveness in naturalized woody plants in New Zealand. *Oikos* 106:308–316

19 Borger C (2007) The biology and ecology of *Salsola australis* R.Br. (Chenopodiaceae) in

20 southwest Australian cropping systems. University of Western Australia

21 Borger CPD, Scott JK, Renton M, Walsh M, Powles SB (2009) Assessment of management

22 options for *Salsola australis* in south-west Australia by transition matrix modelling.

23 *Weed Research* 49:400–408

24 Brown KA, Spector S, Wu W (2008) Multi-scale analysis of species introductions: combining

25 landscape and demographic models to improve management decisions about non-native

26 species. *J Appl Ecol* 45:1639–1648

27 Buckley YM, Brockhoff E, Langer L, Ledgard N, North H, Rees M (2005) Slowing down a

28 pine invasion despite uncertainty in demography and dispersal. *J Appl Ecol* 42:1020–

29 1030

30 Burns JH, Pardini EA, Schutzenhofer MR, Chung YA, Seidler KJ, Knight TM (2013) Greater

31 sexual reproduction contributes to differences in demography of invasive plants and their

32 noninvasive relatives. *Ecology* 94:995–1004

33 Caswell H (2014) Matrix Population Models. In: Wiley StatsRef: Statistics Reference Online.  
 34 John Wiley & Sons, Ltd

35 Ceska A (1999) *Rubus armeniacus* - a correct name for Himalayan blackberries.  
 36 <http://www.ou.edu/cas/botany-micro/ben/ben230.html> Accessed 19 Apr 2017

37 Christman S (1999) *Sapium sebiferum* Plant Profile. In: Floridata: Florida Plant Encyclopedia.  
 38 <http://floridata.com/Plants/Euphorbiaceae/Sapium%20sebiferum/593> Accessed 19 Apr  
 39 2017

40 Clements DR, Upadhyaya MK, Bos SJ (1999) The biology of Canadian weeds. 110. *Tragopogon*  
 41 *dubius* Scop., *Tragopogon pratensis* L., and *Tragopogon porrifolius* L. Can J Plant Sci  
 42 79:153–163

43 Davis AS, Landis DA, Nuzzo V, Blossey B, Gerber E, Hinz HL (2006) Demographic Models  
 44 Inform Selection of Biocontrol Agents for Garlic Mustard (*alliararia Petiolata*). Ecol Appl  
 45 16:2399–2410

46 Davis PB, Menalled FD, Peterson RKD, Maxwell BD (2011) Refinement of weed risk  
 47 assessments for biofuels using *Camelina sativa* as a model species. J Appl Ecol 48:989–  
 48 997

49 DeWalt SJ (2006) Population Dynamics and Potential for Biological Control of an Exotic  
 50 Invasive Shrub in Hawaiian Rainforests. Biol Invasions 8:1145–1158

51 Donaldson S (2002) Identification and management of common teasel (*Dipsacus fullonum*).  
 52 University of Nevada <https://www.unce.unr.edu/publications/files/nr/2002/FS0240.pdf>  
 53 Accessed 19 Apr 2017

54 Drayton B, Primack RB (1999) Experimental Extinction of Garlic Mustard (*Alliaria petiolata*)  
55 Populations: Implications for Weed Science and Conservation Biology. *Biol Invasions*  
56 1:159–167

57 Dunn PH (1976) Distribution of *Carduus nutans*, *C. acanthoides*, *C. pycnocephalus*, and *C.*  
58 *crispus*, in the United States. *Weed Sci* 24:518–524

59 Eckardt (1987) Element Stewardship Abstract for *Rosa multiflora*.  
60 [www.invasive.org/weedcd/pdfs/tncweeds/rosamul.pdf](http://www.invasive.org/weedcd/pdfs/tncweeds/rosamul.pdf) Accessed 19 Apr 2017

61 Eckberg JO, Tenhumberg B, Louda SM (2014) Native insect herbivory limits population growth  
62 rate of a non-native thistle. *Oecologia* 175:129–138

63 Emery SM, Gross KL (2005) Effects of timing of prescribed fire on the demography of an  
64 invasive plant, spotted knapweed *Centaurea maculosa*. *J Appl Ecol* 42:60–69

65 Evans JA, Davis AS, Raghu S, Ragavendran A, Landis DA, Schemske DW (2012) The  
66 importance of space, time, and stochasticity to the demography and management of  
67 *Alliaria petiolata*. *Ecol Appl* 22:1497–1511

68 Flory SL, D’Antonio CM (2015) Taking the long view on the ecological effects of plant  
69 invasions. *Am J Bot* 102:817–818

70 Fremstad E (2010) Invasive Alien Species Fact Sheet – *Lupinus polyphyllus*. Online Database of  
71 the European Network on Invasive Alien Species – NOBANIS. [www.nobanis.org](http://www.nobanis.org).  
72 Accessed 19 Apr 2017

73 González de León S, Herrera I, Guevara R (2016) Mating system, population growth, and  
74 management scenario for *Kalanchoe pinnata* in an invaded seasonally dry tropical forest.  
75 *Ecol Evol* 6:4541–4550

- 76 Gordon DR, Thomas KP (1997) Florida's invasion by nonindigenous plants: history, screening,  
77 and regulation. Strangers in paradise: impact and management of nonindigenous species  
78 in Florida Island Press, Washington, DC, pp 21–37
- 79 Griffith AB (2010) Positive effects of native shrubs on *Bromus tectorum* demography. Ecology  
80 91:141–154
- 81 Harvard University Herbaria accession #00567705. Fernald ML.  
82 [http://kiki.huh.harvard.edu/databases/specimen\\_search.php?mode=details&id=404751](http://kiki.huh.harvard.edu/databases/specimen_search.php?mode=details&id=404751)  
83 Accessed 19 Apr 2017
- 84 Harvey KJ, Nipperess DA, Britton DR, Hughes L (2013) Does time since introduction influence  
85 enemy release of an invasive weed? Oecologia 173:493–506
- 86 Hüls J, Otte A, Eckstein RL (2007) Population life-cycle and stand structure in dense and open  
87 stands of the introduced tall herb *Heracleum mantegazzianum*. Biol Invasions 9:799–811
- 88 Hyatt LA, Araki S (2006) Comparative Population Dynamics of an Invading Species in its  
89 Native and Novel Ranges. Biol Invasions 8:261–275
- 90 Iacarella JC, Mankiewicz PS, Ricciardi A (2015) Negative competitive effects of invasive plants  
91 change with time since invasion. Ecosphere 6:1–14
- 92 Jahodová Š, Trybush S, Pyšek P, Wade M, Karp A (2007) Invasive species of *Heracleum* in  
93 Europe: an insight into genetic relationships and invasion history. Divers Distrib 13:99–  
94 114
- 95 Jongejans E, Shea K, Skarpaas O, Kelly D, Sheppard AW, Woodburn TL (2008) Dispersal and  
96 demography contributions to population spread of *Carduus nutans* in its native and  
97 invaded ranges. J Ecol 96:687–697

- 98 Koop AL, Horvitz CC (2005) Projection Matrix Analysis of the Demography of an Invasive,  
99 Nonnative Shrub (*ardisia Elliptica*). Ecology 86:2661–2672
- 100 Lambrecht-McDowell SC, Radosevich SR (2005) Population demographics and trade-offs to  
101 reproduction of an invasive and noninvasive species of Rubus. Biol Invasions 7:281–295
- 102 Langeland KA, Craddock Burks K (eds) (1998) Identification & biology of non-native plants in  
103 Florida's natural areas. University of Florida, Institute of Food and Agricultural Sciences,  
104 Gainesville
- 105 Lesica P, Ellis M (2010) Demography of Sulfur Cinquefoil (*Potentilla recta*) in a Northern  
106 Rocky Mountain Grassland. Invasive Plant Sci Manag 3:139–147
- 107 Luken JO, Thieret JW (1996) Amur Honeysuckle, Its Fall from Grace. BioScience 46:18–24
- 108 Luken JO, Thieret JW (1997) Assessment and Management of Plant Invasions. Springer, New  
109 York
- 110 Mack RN (1986) Alien Plant Invasion into the Intermountain West: A Case History. In: Mooney  
111 HA, Drake JA (eds) Ecology of Biological Invasions of North America and Hawaii.  
112 Springer, New York, pp191–213
- 113 Mack RN (2003) Plant Naturalizations and Invasions in the Eastern United States: 1634-1860.  
114 Ann Missouri Bot Gard 90:77–90
- 115 Mack RN, Erneberg M (2002) The United States Naturalized Flora: Largely the Product of  
116 Deliberate Introductions. Annals Missouri Botanical Garden 89:176–189
- 117 Marco DE, Páez SA (2000) Invasion of *Gleditsia triacanthos* in *Lithraea ternifolia* Montane  
118 Forests of Central Argentina. Environ Manag 26:409–419

119 Maron JL, Horvitz CC, Williams JL (2010) Using experiments, demography and population  
 120 models to estimate interaction strength based on transient and asymptotic dynamics. J  
 121 Ecol 98:290–301  
 122 Medd RW (1987) Impact of legislative actions on the invasion of *Carduus nutans*. Weed Society  
 123 of New South Wales, pp 290–293  
 124 Medley Me, Bryan H, MacGregor J, Thieret JW (1985) *Achyranthes japonica* (Miq) Nakai  
 125 (Amaranthaceae) in Kentucky and West Virginia: new to North America. SIDA, Contrib  
 126 Bot 11:92–95  
 127 Meekins JF, McCarthy BC (2000) Responses of the biennial forest herb *Alliaria petiolata* to  
 128 variation in population density, nutrient addition and light availability. J Ecol 88:447–463  
 129 Missouri Botanical Garden Herbarium accession #29443. Grimmer L  
 130 <http://www.tropicos.org/Specimen/100513946> Accessed 19 Apr 2017  
 131 Missouri Botanical Garden Herbarium accession Julian A. Steyermark - 67357. Steyermark J.  
 132 <http://www.tropicos.org/Specimen/3544157> Accessed 19 Apr 2017  
 133 Moul ET (1948) A dangerous weedy Polygonum in Pennsylvania. Rhodora 50:64–66  
 134 Nehrbass N, Winkler E, Pergl J, Perglová I, Pysek P (2006) Empirical and virtual investigation  
 135 of the population dynamics of an alien plant under the constraints of local carrying  
 136 capacity: *Heracleum mantegazzianum* in the Czech Republic. Perspect Plant Ecol Evol  
 137 Syst 7:253–262  
 138 Nishiwaki A, Mizuguti A, Kuwabara S, Toma Y, Ishigaki G, Miyashita T, Yamada T, Matuura  
 139 H, Yamaguchi S, Rayburn AL, Akashi R, Stewart JR (2011) Discovery of natural  
 140 *Miscanthus* (Poaceae) triploid plants in sympatric populations of *Miscanthus*  
 141 *sacchariflorus* and *Miscanthus sinensis* in southern Japan. Am J Bot 98:154–159

142 Novak SJ, Mack RN (2001) Tracing Plant Introduction and Spread: Genetic Evidence from  
143 *Bromus tectorum* (Cheatgrass) Introductions of the invasive grass *Bromus tectorum*  
144 worldwide were broadly similar and closely tied to patterns of European human  
145 immigration. *BioScience* 51:114–122

146 Nuzzo V (1993) Distribution and spread of the invasive biennial *Alliaria petiolata* (garlic  
147 mustard) in North America. *Indiana Academy of Science*, pp 137-145

148 Osunkoya OO, Perrett C, Fernando C, Clark C, Raghu S (2013) Modeling population growth and  
149 site specific control of the invasive *Lantana camara*. *Popul Ecol* 55:291-303

150 Parker IM (2000) Invasion Dynamics of *Cytisus Scoparius*: A Matrix Model Approach. *Ecol*  
151 *Appl* 10:726–743

152 Peterson DJ, Prasad R (1998) The biology of Canadian weeds. 109. *Cytisus scoparius* (L.) Link.  
153 *Can J Plant Sci* 78:497–504

154 Pittman SE, Muthukrishnan R, West NM, Davis AS, Jordan NR, Forester JD (2015) Mitigating  
155 the potential for invasive spread of the exotic biofuel crop, *Miscanthus × giganteus*. *Biol*  
156 *Invasions* 17:3247–3261

157 Popay AI, Medd RW (1990) The biology of Australian weeds. 21. *Carduus nutans* L. ssp. *nutans*.  
158 *Plant Protection Quarterly* 5:3–13

159 Prev  y JS, Germino MJ, Huntly NJ (2010) Loss of foundation species increases population  
160 growth of exotic forbs in sagebrush steppe. *Ecol Appl* 20:1890–1902

161 Prieto AR, Blasi AM, De Francesco CG, Fern  ndez C (2004) Environmental history since  
162 11,000 14C yr B.P. of the northeastern Pampas, Argentina, from alluvial sequences of the  
163 Luj  n River. *Quaternary Res* 62:146–161



164 Raghu S, Wilson JR, Dhileepan K (2006) Refining the process of agent selection through  
 165 understanding plant demography and plant response to herbivory. *Aust J Entomol*  
 166 45:308–316

167 Ramula S (2014) Linking vital rates to invasiveness of a perennial herb. *Oecologia* 174:1255–  
 168 1264

169 Ramula S, Buckley YM (2010) Management recommendations for short-lived weeds depend on  
 170 model structure and explicit characterization of density dependence. *Methods Ecol Evol*  
 171 1:158–167

172 Renne IJ (2001) Invasion of Chinese tallow tree: causes, consequences and forecast. PhD thesis.  
 173 Clemson University, Clemson, South Carolina

174 Ridley CE, Ellstrand NC (2010) Rapid evolution of morphology and adaptive life history in the  
 175 invasive California wild radish (*Raphanus sativus*) and the implications for management.  
 176 *Evol Appl* 3:64–76

177 Roché BFJ, Piper GL, Talbott CJ (1986) Knapweeds of Washigton. Extension bulletin -  
 178 Washington State University, Cooperative Extension Service (USA)

179 Rogler GA, Lorenz RJ (1983) Crested wheatgrass: early history in the United States. *J Range*  
 180 *Manag* 36:91–93

181 Rousseau C (1968) Histoire, habitat et distribution de 220 plantes introduites au Québec. *Le*  
 182 *Naturaliste Canadien* 95:49–169

183 Schutzenhofer MR, Valone TJ, Knight TM (2009) Herbivory and population dynamics of  
 184 invasive and native *Lespedeza*. *Oecologia* 161:57–66

185 Schwartz L (2015) A comparative study of the population dynamics of four *Amaranthaceae*  
 186 species.

187 <http://opensiuc.lib.siu.edu/cgi/viewcontent.cgi?article=2091&context=dissertations>  
 188 Accessed 19 Apr 2017

189 Sebert-Cuvillier E, Paccaut F, Chabrierie O, Endels P, Goubet O, Decocq G (2007) Local  
 190 population dynamics of an invasive tree species with a complex life-history cycle: A  
 191 stochastic matrix model. *Ecol Model* 201:127–143

192 Shea K, Kelly D (1998) Estimating Biocontrol Agent Impact with Matrix Models: *Carduus*  
 193 *Nutans* in New Zealand. *Ecol Appl* 8:824–832

194 Shea K, Kelly D, Sheppard AW, Woodburn TL (2005) Context-Dependent Biological Control of  
 195 an Invasive Thistle. *Ecology* 86:3174–3181

196 Smith CW (1992) Distribution, status, phenology, rate of spread, and management of *Clidemia* in  
 197 Hawaii. *Alien plant invasions in native ecosystems of Hawaii* University of Hawaii Press,  
 198 Honolulu 241–253

199 Starfinger U (2010) NOBANIS – Invasive Alien Species Fact Sheet – *Prunus serotina*. Online  
 200 Database of the European Network on Invasive Alien Species – NOBANIS.  
 201 [www.nobanis.org](http://www.nobanis.org). Accessed 19 Apr 2017

202 Stewart-Wade SM, Neumann S, Collins LL, Boland GJ (2002) The biology of Canadian weeds.  
 203 117. *Taraxacum officinale* G. H. Weber ex Wiggers. *Can J Plant Sci* 82:825–853

204 Stokes KE, Buckley YM, Sheppard AW (2006) A modelling approach to estimate the effect of  
 205 exotic pollinators on exotic weed population dynamics: bumblebees and broom in  
 206 Australia. *Divers Distrib* 12:593–600

207 Swarbrick JT (1986) History of the lantanas in Australia and origins of the weedy biotypes. *Plant*  
 208 *Protection Quarterly* 1:115–121

209 Taylor CM, Hastings A (2004) Finding optimal control strategies for invasive species: a density-  
210 structured model for *Spartina alterniflora*. J Appl Ecol 41:1049–1057.

211 Tenhumberg B, Louda SM, Eckberg JO, Takahashi M (2008) Monte Carlo analysis of parameter  
212 uncertainty in matrix models for the weed *Cirsium vulgare*. J Appl Ecol 45:438–447

213 Trinklein D (2014) Iris: A Brief History. Missouri Environment and Garden News Article.  
214 Integrated Pest Management, University of Missouri  
215 <http://ipm.missouri.edu/MEG/2014/6/Iris-A-Brief-History/> Accessed 19 Apr 2017

216 Upadhyaya MK, Tilsner HR, Pitt MD (1988) The biology of Canadian weeds.: 87. *Cynoglossum*  
217 *officinale* L. Can J Plant Sci 68:763–774

218 van Klinken RD, Pichancourt JB (2015) Population-level consequences of herbivory, changing  
219 climate, and source–sink dynamics on a long-lived invasive shrub. Ecol Appl 25:2255–  
220 2270

221 Vavrek MC, McGraw JB, Yang HS (1997) Within-Population Variation in Demography of  
222 *Taraxacum Officinale*: Season- and Size-Dependent Survival, Growth and Reproduction.  
223 J Ecol 85:277–287

224 Wadsworth FH (1943) Pomarrosa, *Jambosa jambos* (L.) Millsp. and its place in Puerto Rico.  
225 Caribbean Forester 4:183–94

226 Waterhouse BM (1988) Broom (*Cytisus scoparius*) at Barrington Tops, New South Wales.  
227 Australian Geographical Studies 26:239–248

228 Watson S (1885) A history and revision of the roses of North America. Proc Am Acad Arts Sci  
229 New Series vol. XII, Whole Series vol. XX:324–352

230 Williams JL, Auge H, Maron JL (2010) Testing hypotheses for exotic plant success: parallel  
231 experiments in the native and introduced ranges. Ecology 91:1355–1366

232 Woods W (1992) Phytophagous insects collected from *Parkinsonia aculeata* [*Leguminosae*:  
233 *Caesalpinaceae*] in the Sonoran desert region of the southwestern United States and  
234 Mexico. Entomophaga 37:465–474  
235

236 Supplementary Material 2

237

238 Model selection removing the dependence of the multiple populations of the same species on  
239 elasticities:

240

241 For some species, multiple populations of the same species are included in the  
242 analyses. This suggests that data from these species may be correlated violating the  
243 assumption of independence in the regression analysis. We conducted an additional  
244 analysis in which only one set of population data was used for each species to remove the  
245 dependence of the multiple data points for one species. The dataset includes four  
246 populations of *Alliaria petiolata* and *Carduus nutans* and include two populations of  
247 *Cytisus scoparius*, *Heracleum mantegazzianum*, and *Taraxacum officinale*. There are 128  
248 cases to choose one population for each species. We picked up one population for each  
249 species and calculated AIC and BIC values of the 6 models for the 128 cases (The AIC  
250 and BIC values are shown in Table S2 in ESM).

251 The best model selected by AIC includes both years since introduction and matrix  
252 dimension for all 128 cases. On the other hand, the best model selected by BIC in 71.9%  
253 of the cases (92 cases) includes only years since introduction and the best model in 28.1%  
254 of the cases (36 cases) includes years since introduction and matrix dimension as a  
255 covariate. Based on the best models selected by AIC and BIC, it is reasonable to consider  
256 that elasticities change with time since introduction.

257

258

259 Table S2

260 (a) AIC and (b) BIC values of the 6 models for the 128 cases.

261

262 Cells of minimum values of AIC or BIC are shaded. Asterisks represent that the populations are

263 selected in the calculations of AIC or BIC.
